# Supplementary material for: Rating scales for shoulder and elbow range of motion impairment: Call for a functional approach
Source: PLOS journal article supplement (doi:10.1371/journal.pone.0200710), 2018-08-01
Supplement: S1 (10.1371/journal.pone.0200710.s001) [file journal.pone.0200710.s001]

Supporting information Table 1: Demographic and medical characteristics of the study population.

|                                   |            | Total <sup>#</sup> | Shoulder    | Elbow       |
|-----------------------------------|------------|--------------------|-------------|-------------|
| N subjects                        |            | 39                 | 20          | 26          |
| N burned shoulder/ elbow          |            | 63                 | 28          | 35          |
| Location burn injury              | Left side  | -                  | 4           | 4           |
|                                   | Right side | -                  | 8           | 13          |
|                                   | Bilateral  | -                  | 8           | 9           |
| Sex (% male)                      |            | 62                 | 55          | 69          |
| Age (mean (sd) in years)          |            | 37.8 (23.0)        | 43.0 (24.3) | 34.3 (22.1) |
| Age (range in years)              |            | 0-79               | 0-79        | 0-65        |
| TBSA (mean (sd) in %)             |            | 14.8 (16.2)        | 17.2 (14.4) | 15.8 (17.2) |
| TBSA (range in %)                 |            | -                  | 1-48%       | 1-66%       |
| Full thickness TBSA (mean (sd) %) |            | 3.5 (8.9)          | 4.5 (8.5)   | 4.7 (10.5)  |
| LOS (mean (sd) days)              |            | 29.8 (22.4)        | 34.4 (18.2) | 30.3 (25.6) |

<sup>#</sup> In some patients more than one joint is burned; TBSA: Total Body Surface Area; LOS: Length of stay at the hospital.
